# Supplementary material for: Resilience to autosomal dominant Alzheimer’s disease in a Reelin-COLBOS heterozygous man
Source: PubMed Central journal article supplement (PMC10202812; doi:10.1038/s41591-023-02318-3), 2023-05-15

Source data for Figure 2: Uncropped western blotting

A

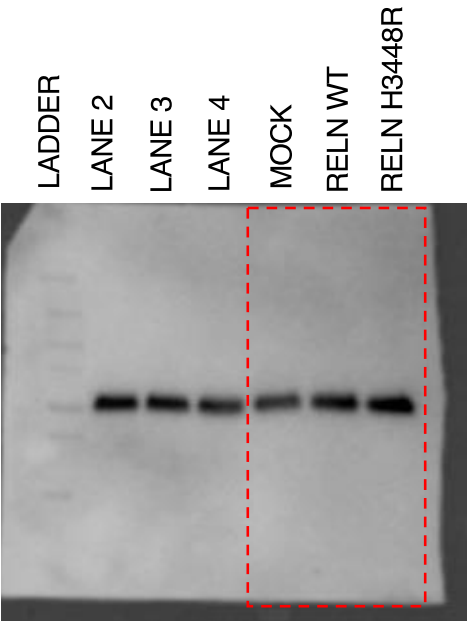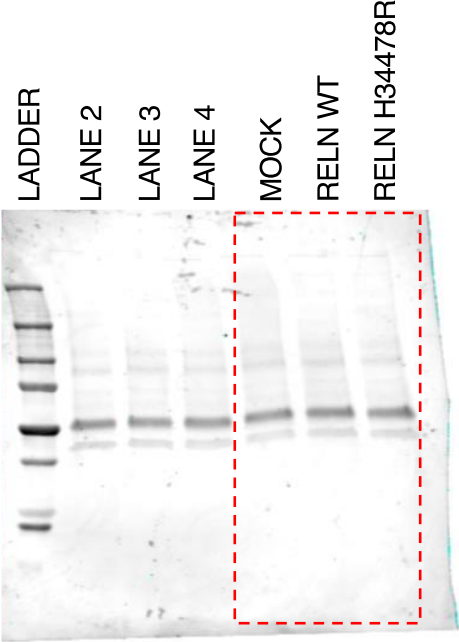

Supplement: 41591_2023_2318_MOESM6_ESM.pdf [file 41591_2023_2318_MOESM6_ESM.pdf]
