# Supplementary material for: Resilience to autosomal dominant Alzheimer’s disease in a Reelin-COLBOS heterozygous man
Source: PubMed Central journal article supplement (PMC10202812; doi:10.1038/s41591-023-02318-3), 2023-05-15

Full unprocessed scans for Extended Data Figure 5a.

Hippocampus

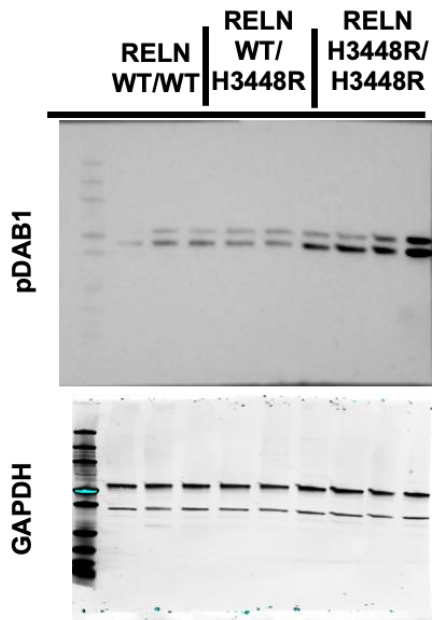

Frontal cortex

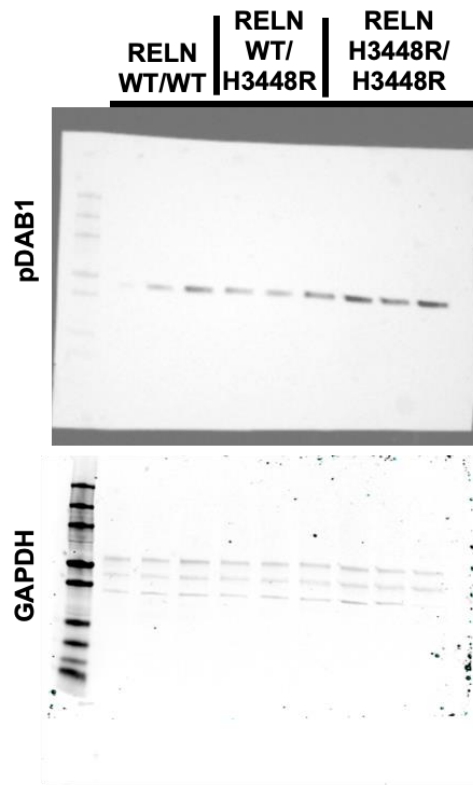

Parietal-occipital cortex

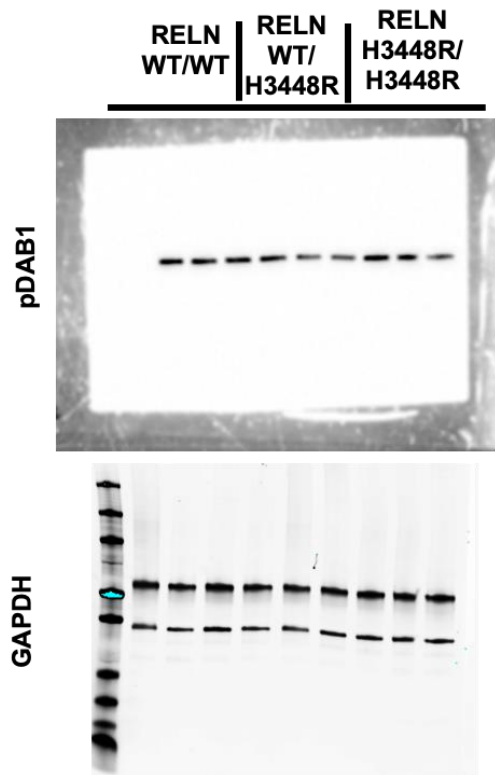

Supplement: 41591_2023_2318_MOESM8_ESM.pdf [file 41591_2023_2318_MOESM8_ESM.pdf]
